# Supplementary material for: Systematic surface bowing in 2D III-nitride monolayers
Source: Royal Society of Chemistry journal article supplement (doi:10.1039/d4ra01310g), 2024-01-01
Supplement: d4ra01310g1.pdf [file d4ra01310g1.pdf]

## Supporting Information

### Extraordinary systematic surface bowing effect in BN, AlN, GaN and InN monolayers through Buckyballs: A DFT study

Imdad Hussain<sup>1,2</sup>, Adnan Ali Khan<sup>1,3</sup>, Iftikhar Ahmad<sup>1,2\*</sup>, Rashid Ahmad<sup>1,3</sup>, Saif Ullah<sup>1,2</sup>,

<sup>1</sup>Department of Physics, University of Malakand, Chakdara, Pakistan

<sup>2</sup>Center for Computational Materials Science, University of Malakand, Chakdara, Pakistan

<sup>3</sup>Department of Chemistry, University of Malakand, Chakdara, Pakistan

\*Corresponding author: [ahma5532@gmail.com](mailto:ahma5532@gmail.com) (I. Ahmad)

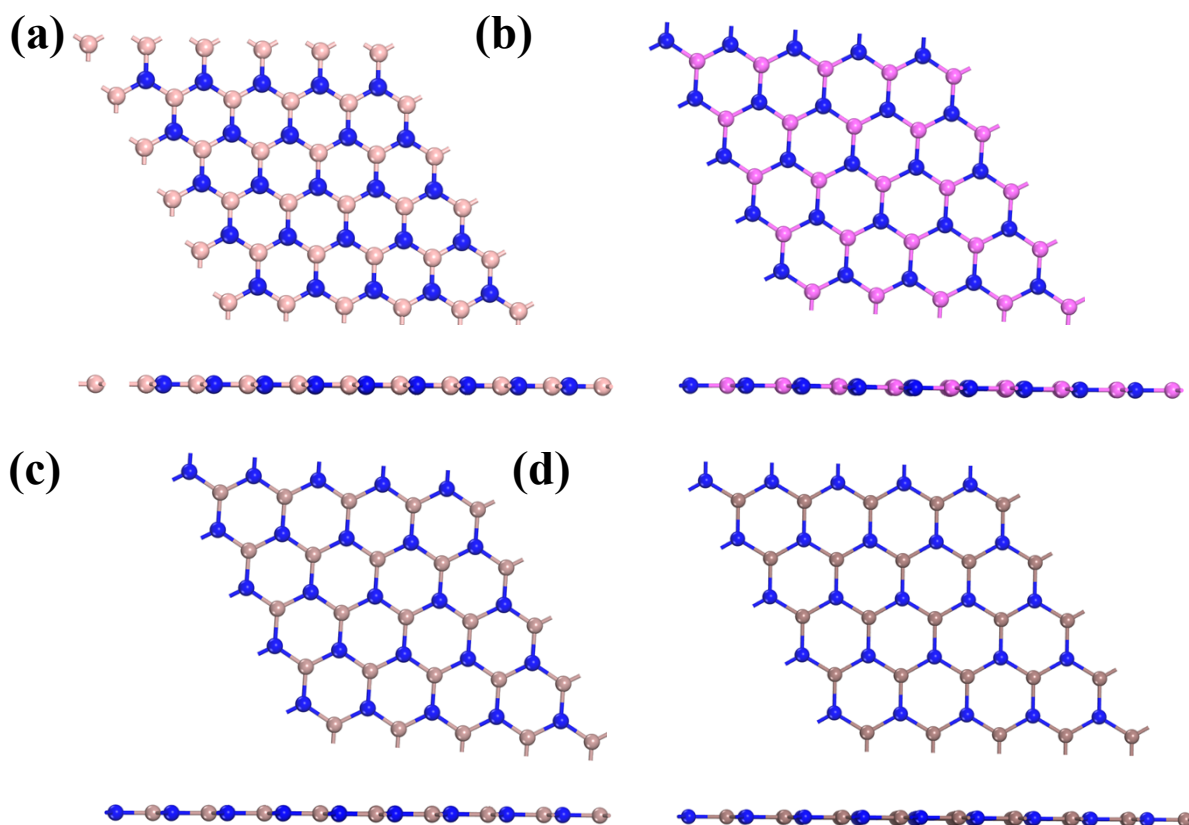

**Figure S1.** 2D optimized structures of (a) BN, (b) AlN, (c) GaN and (d) InN

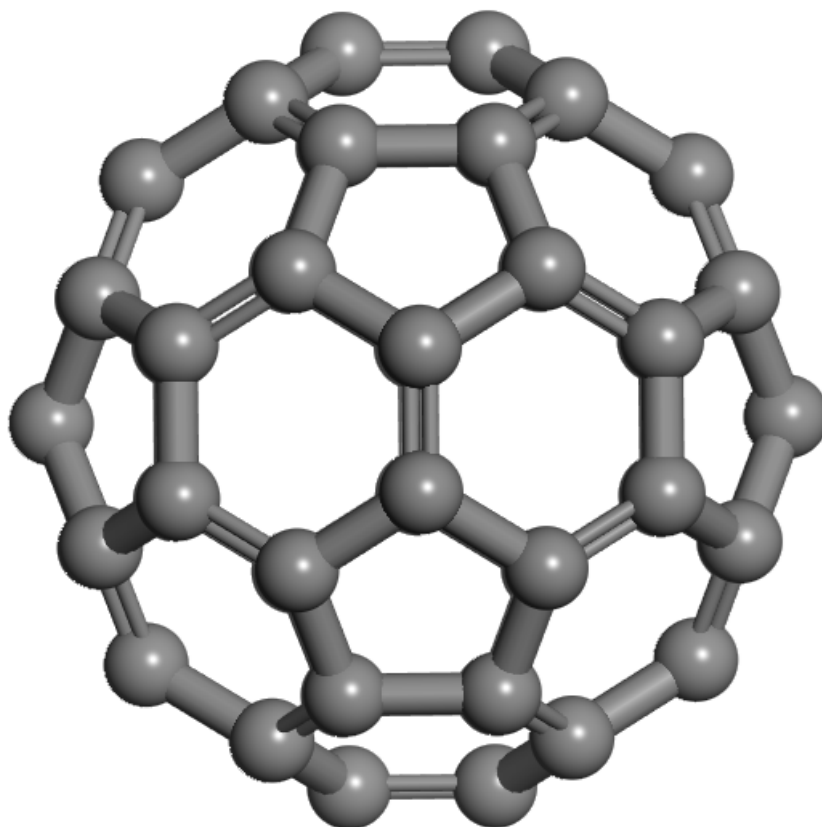

**Figure S2.** Optimized geometry of C<sub>60</sub> fullerene
